# Supplementary material for: RNF43 G659fs is an oncogenic colorectal cancer mutation and sensitizes tumor cells to PI3K/mTOR inhibition
Source: PubMed Central journal article supplement (PMC9177965; doi:10.1038/s41467-022-30794-7), 2022-06-08
Supplement: 41467_2022_30794_MOESM1_ESM.pdf [file 41467_2022_30794_MOESM1_ESM.pdf]

## Supplementary Fig. 1 | Genome-Editing of *RNF43* in CRC cell lines

**A**

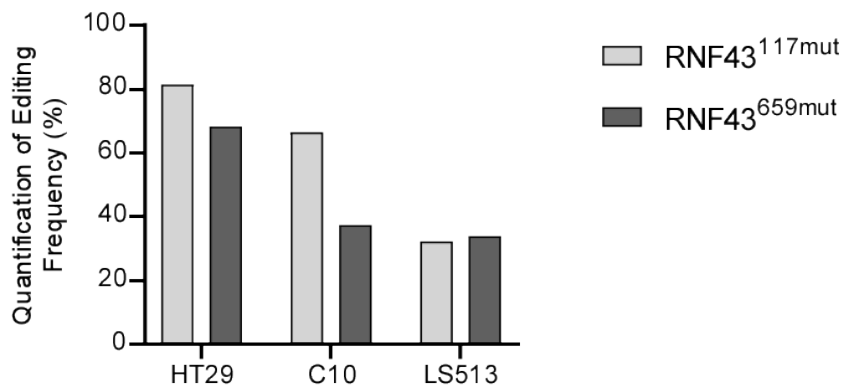

**B**

WT CGACACCCACAGAGGAAAAGGCGGGGGGTCCCTCCGAGCCCACCCCTGGCTCT  
R H P Q R K R R G G P S E P T P G S

Sg-Ctrl CGACACCCACAGAGGAAAAGGCGGGGGGTCCCTCCGAGCCCACCCCTGGCTCT  
C1C5 R H P Q R K R R G G P S E P T P G S

HT29-C1 CGACACCCACAGAGGA-----GCCACCCCTGGCTCT (-22)  
R H P Q R S P P L A

HT29-C2 CGACACCC-----TCCGAGCCCACCCCTGGCTCT (-25)  
R H P P S P P L A

HT29-C3 CGACACCCACAGAGGAAAAGG--GGGGGGTCCCTCCGAGCCCACCC--TGGCTCT (-3)  
R H P Q R K R G G S L R A H P G S

HT29-C4 CGACACCCACAGAGGAA--GG--GGGGGGTCCCTCCGAGCCCACCC--GGCTCT (-5)  
R H P Q R K G G V P P S P P R L

HT29-C5 CGACACCCACAGAGG-----CGGGGG--TCCCTCCGAGCCCACCCCTGGCTCT (-7)  
R H P Q R R G V P P S P P L A S

HT29-C6 CGACACCCACAGAGGAAAAGGCGGGGGGGGTCCCTCCGAGCCCACCCCTGGCTC (+1)  
R H P Q R K R R G G S L R A H P W L

HT29-C7 CGACACCCACAGAGGAAAAGAGGCGGGGGGGGTCCCTCCGAGCCCACCCCTGGCT (+2)  
R H P Q R K R R G G S L R A H P W L

LS513-C8 CGACA-----CCCACCCCTGGCTCT (-34)  
R H P P L A

LS513-C9 CGACACCCACAGAGGAAAAGGCGG-----TCCCTCCGAGCCCACCCCTGGCTCT (-5)  
R H P Q R K R R S L R A H P W L

**C**

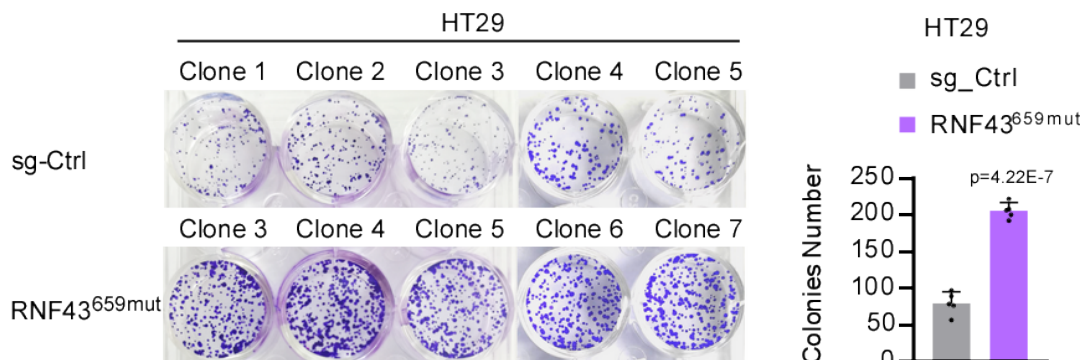

**A**, Quantification of CRISPR/Cas9 *RNF43*\_G659fs and *RNF43*\_R117fs editing in HT29, C10 and LS513 cells. **B**, Next generation sequencing of isogenic clones displaying *RNF43*\_G659fs editing in HT29 and LS513 cells. Values in parentheses represent the total number of absent or additional nucleotides. **C**, Representative colony formation assays of 5 HT29-sg-Ctrl and HT29-*RNF43*<sup>659mut</sup> isogenic clones (C3 to C7) in the absence of Wnt ligand and quantification of average number of sg\_Ctrl and *RNF43*<sup>659mut</sup> colonies larger than 10  $\mu$ m. Data are the mean  $\pm$  SD. Student's t-test ( $n = 3$  independent experiments in triplicate). Source data are provided as a Source Data file.

**Supplementary Fig. 2 | Wnt pathway protein expression in HT29-*RNF43*<sup>659mut</sup> cells**

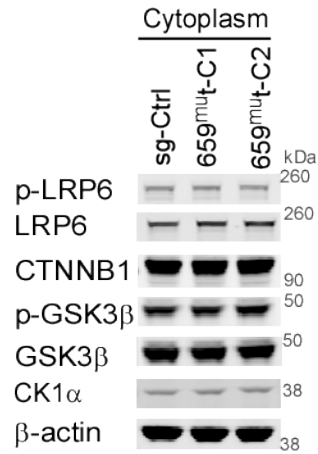

Western blot analysis of Wnt pathway proteins p-LRP6, LRP6, CTNNB1, p-GSK3 $\beta$ , GSK3 $\beta$ , CK1 $\alpha$  and  $\beta$ -actin loading control in HT29-sg-Ctrl and two isogenic HT29-*RNF43*<sup>659mut</sup> cell clones. Source data are provided as a Source Data file

Supplementary Fig. 3 | Sensitivity of *RNF43*<sup>659mut</sup> to mTOR/PI3K inhibitors

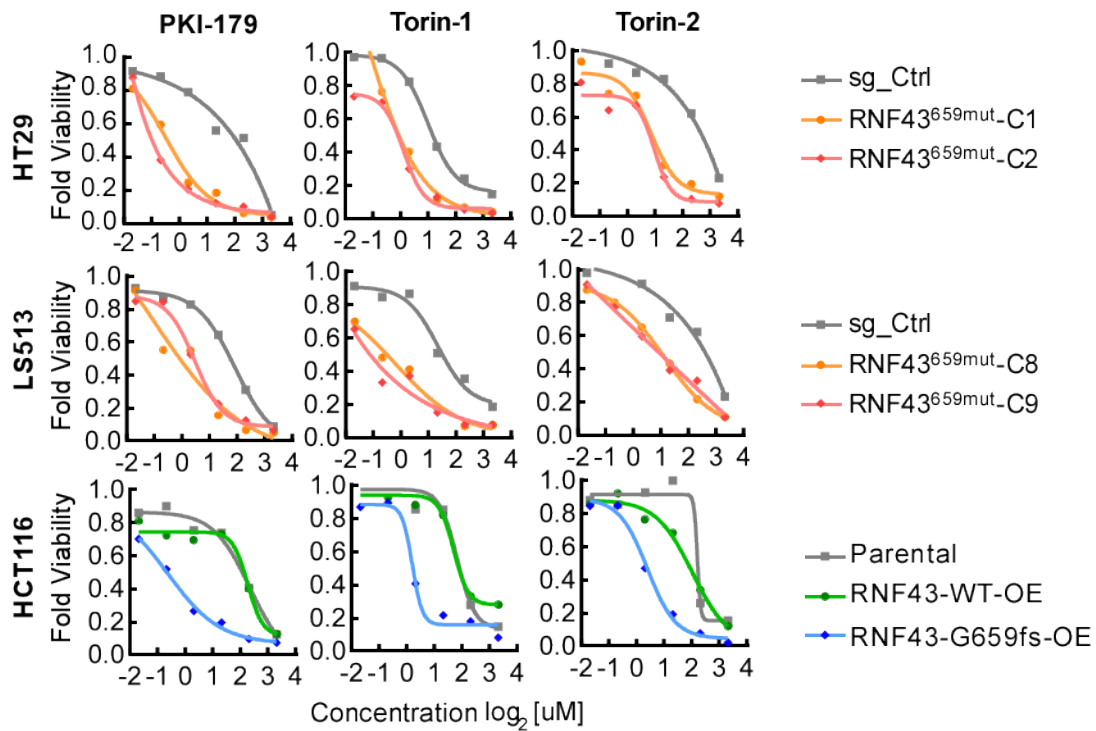

PKI-179, Torin-1 and Torin-2 dose-response curves in either *RNF43*<sup>659mut</sup> edited cells (HT29, LS513) or ectopically expressing *RNF43\_G659Vfs\*41* cells (HCT116) compared to controls. Experiments were performed in triplicate. Source data are provided as a Source Data file.

### Supplementary Fig. 4 | PI3Ki sensitivity in TCGA CRCs

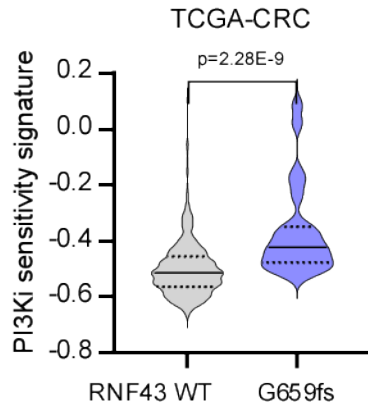

PI3K inhibitor sensitivity transcriptional signatures in RNF43\_WT and RNF43\_G659fs TCGA CRCs. Two-sided Student's t-test. Source data are provided as a Source Data file.

**Supplementary Fig. 5 | PI3K/mTOR pathway expression in WT and *RNF43\_G659fs* overexpressing cells**

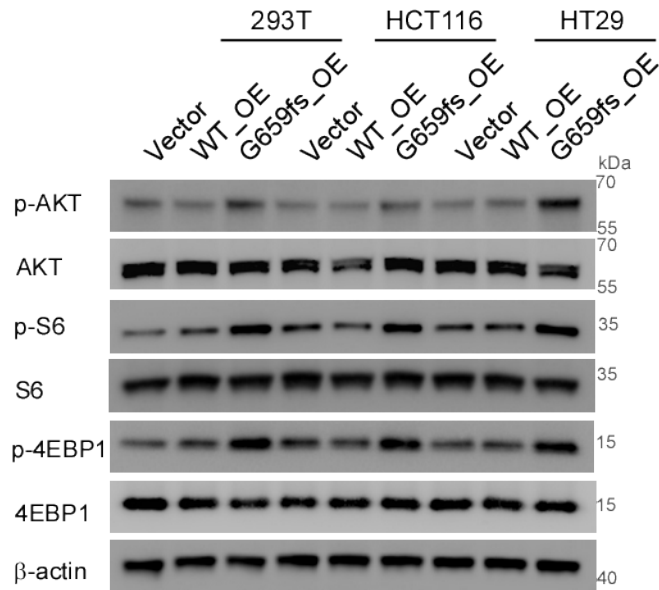

Western blot analysis of PI3K/mTOR pathway proteins p-AKT (S473), AKT, p-S6 (S235/236), S6, p-4EBP1, 4EBP1 in 293T, HCT116 and HT29 cell lines overexpressing empty vector (Vector), *RNF43*<sup>WT</sup> (WT\_OE) or *RNF43*<sub>p.G659Vfs</sub> (G659fs\_OE). β-actin shown as loading control. Source data are provided as a Source Data file.

## Supplementary Fig. 6 | PI3K/mTOR pathway expression in isogenic HT29 clones

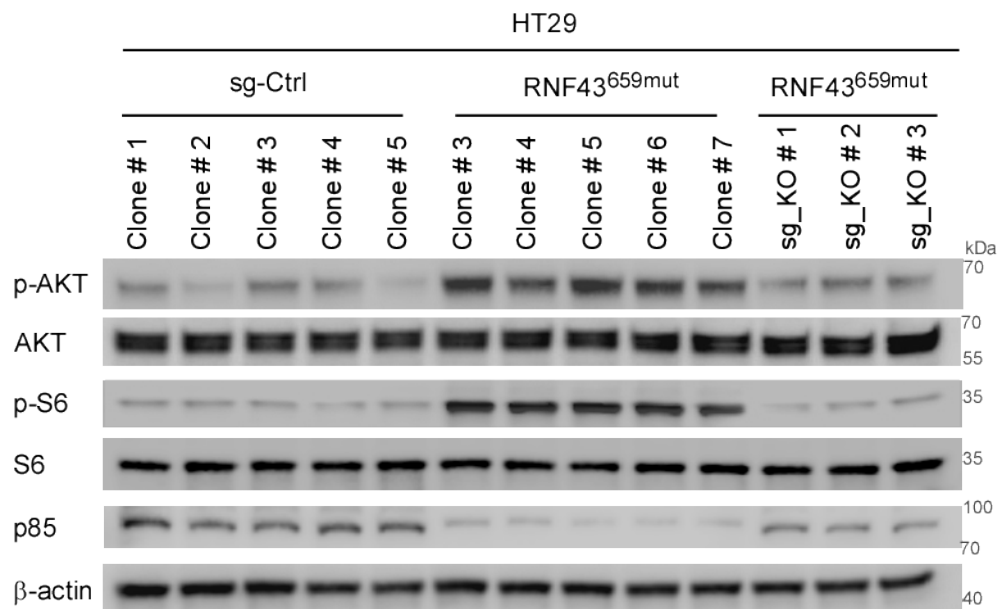

Western blot analysis of PI3K/mTOR pathway proteins p-AKT (S473), AKT, p-S6 (S235/236), S6, and p85 in isogenic HT29 sg-Ctrl, *RNF43*<sup>659mut</sup> and *RNF43*<sup>659mut</sup>-KO cells. Source data are provided as a Source Data file.

Supplementary Fig. 7 | Cell proliferation with *RNF43*<sup>659mut</sup> knockout or inhibition

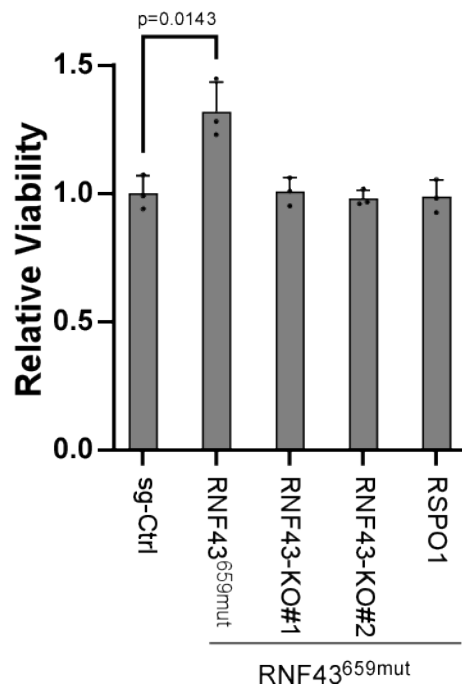

Cell Titer-Glo luminescence assay in sg-Ctrl and HT29 *RNF43*<sup>659mut</sup>-C1 cells alone or with sg-RNF43-KO or RSP01 (500 ng/mL) treatment. Data are the mean ± SD. Student's t-test ( $n = 3$  independent experiments in triplicate). Source data are provided as a Source Data file.



**Supplementary Fig. 8 | AKT knockdown in *RNF43*<sup>659mut</sup> edited CRC cells**

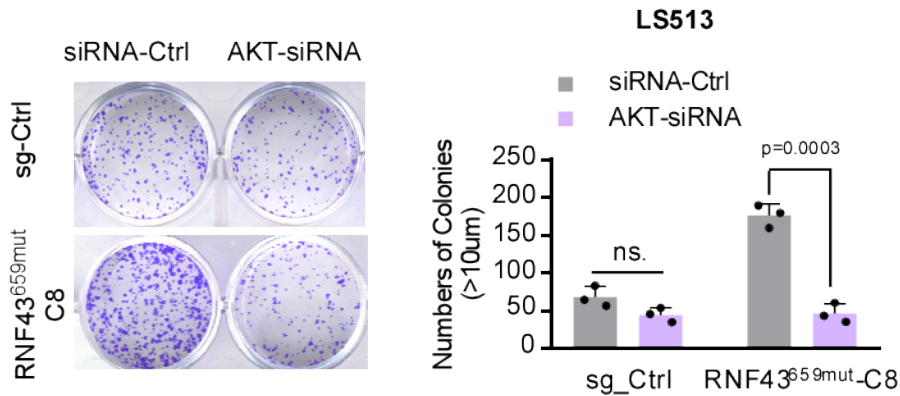

Representative colony formation assay (left) and quantification of number of colonies (right) after transfection of an AKT-siRNA on LS513 *RNF43*<sup>659mut</sup>-C8 edited and sg-Ctrl isogenic cells. Data are the mean  $\pm$  SD. Student's t-test ( $n = 3$  independent experiments in triplicate). Source data are provided as a Source Data file.

## Supplementary Fig. 9 | p-S6 and p-AKT expression in TCGA and CCLE CRCs

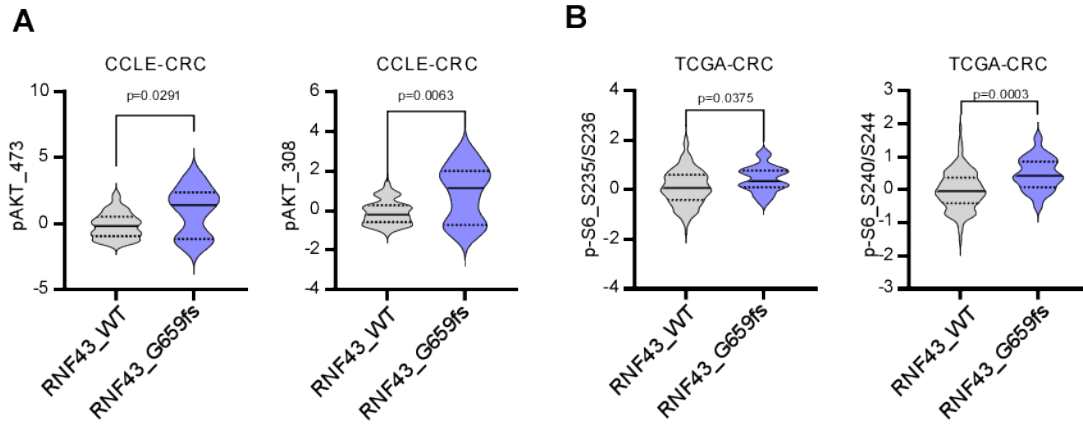

**A**, p- AKT\_473 (left) and p-AKT\_308 (right) expression in Cancer Cell Line Encyclopedia colorectal cancer (CCLE CRC) cell lines. Two-sided Student's t-test used to compare RNF43\_WT (n=40), RNF43\_G659fs (n=6). **B**, p-S6 S235/S236 (left) and p-S6\_S240/S244 (right) expression in The Cancer Genome Atlas colorectal cancers (TCGA CRCs). Two-sided Student's t-test used to compare RNF43\_WT (n=276), RNF43\_G659fs (n=21). Source data are provided as a Source Data file.

### Supplementary Fig. 10 | RNF43-G659Vfs reduces p85 post translational stability

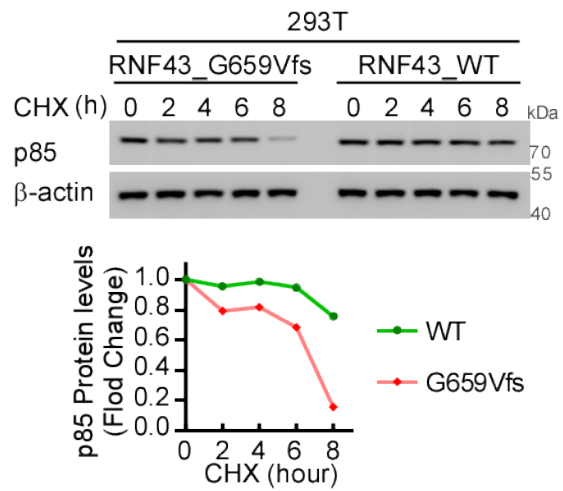

Western blot analysis (above) and quantification (below) of p85 expression following cycloheximide (CHX) treatment of 293T cells expressing RNF43\_WT or RNF43\_G659Vfs. Source data are provided as a Source Data file.

**Supplementary Fig. 11 | p85 expression in WT and *RNF43\_G659fs* cells and p85 knockdown impact on colony formation**

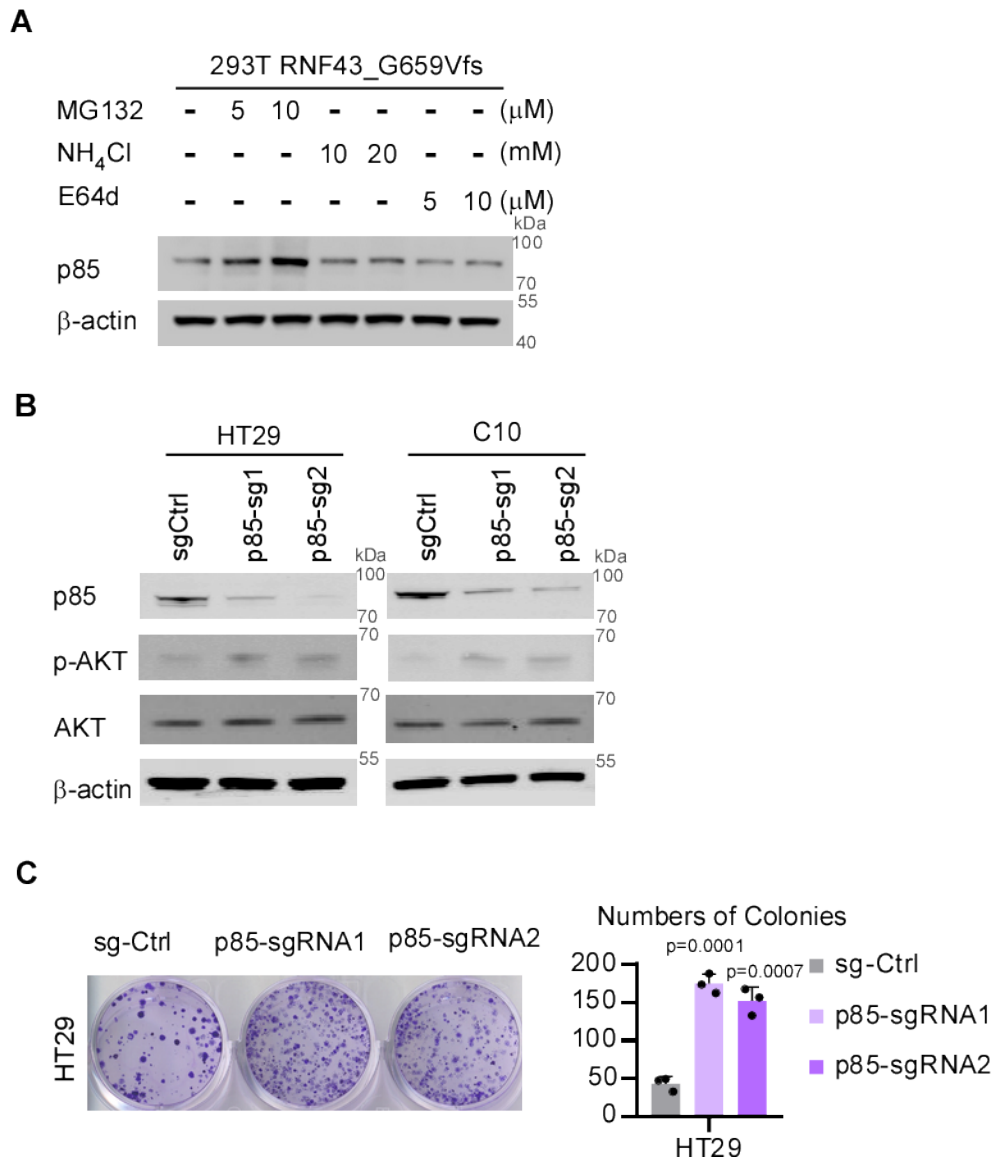

**A**, Expression of p85 in vector, WT and G659fs 293T cells treated with and without MG132, NH<sub>4</sub>Cl and E64d at the indicated doses. **B**, p85 knockdown and p-AKT and AKT in HT29 and C10-edited cells. **C**, Colony formation assay in HT29 sg-Ctrl, p85-sgRNA1 (sg1) and p85-sgRNA2 (sg2) with representative image (left) and quantification (right). Data are the mean  $\pm$  SD. Two-sided Student's t-test ( $n = 3$  independent experiments in triplicate). Source data are provided as a Source Data file.

**Supplementary Fig. 12 | RNF43\_G659Vfs promotes ubiquitination of p85**

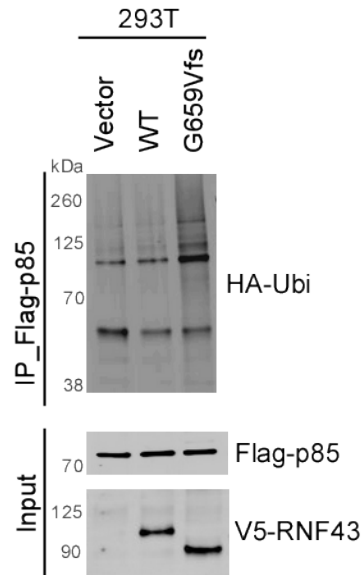

Co-immunoprecipitation assay assessing ubiquitination of Flag-p85 in HEK293T cells expressing V5-tagged vector, *RNF43*-WT, or *RNF43*-G659Vfs\*41. Source data are provided as a Source Data file.

**Supplementary Fig. 13 | Poly-ubiquitination of p85 in HT29-*RNF43*<sup>659mut</sup>**

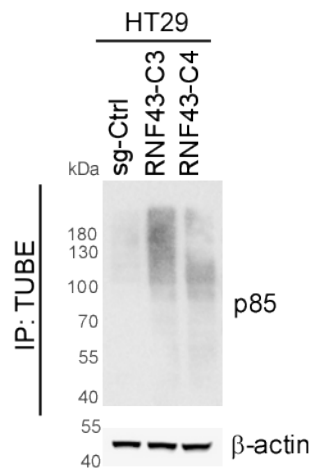

Tandem Ubiquitin Binding Entities (TUBEs) immunoprecipitation from isogenic *RNF43*<sup>659mut</sup> HT29 cell lysates followed by immunoblotting for p85. Source data are provided as a Source Data file.

**Supplementary Fig. 14 | Computational modeling of RNF43 with hypothesized RNF43\_659fs/p85 interaction**

**A**

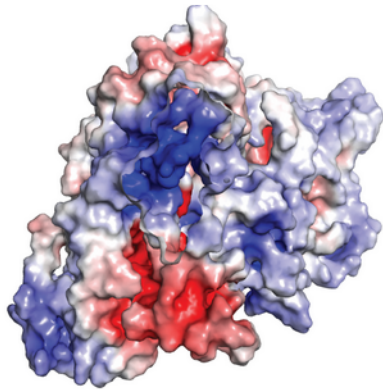

**B**

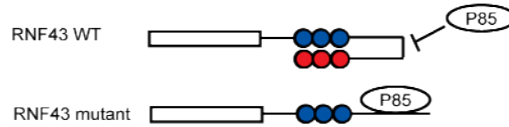

**A**, Electrostatic view of WT RNF43 model. Electrostatic potential is expressed as a spectrum ranging from -5 kT/e (red) to +5 kT/e (blue). The RNF43 model was predicted by the Zhang server (<https://zhanglab.dcmf.med.umich.edu/I-TASSER/>). **B**, Schemas of RNF43 wildtype and G659fs interaction with p85. Positively charged region (~aa 551-578) and negatively charged region (~aa 736-781) are shown in blue and red color, respectively.

### Supplementary Fig. 15 | Gene Set Enrichment Analysis of HT29 *RNF43*<sup>659mut</sup>

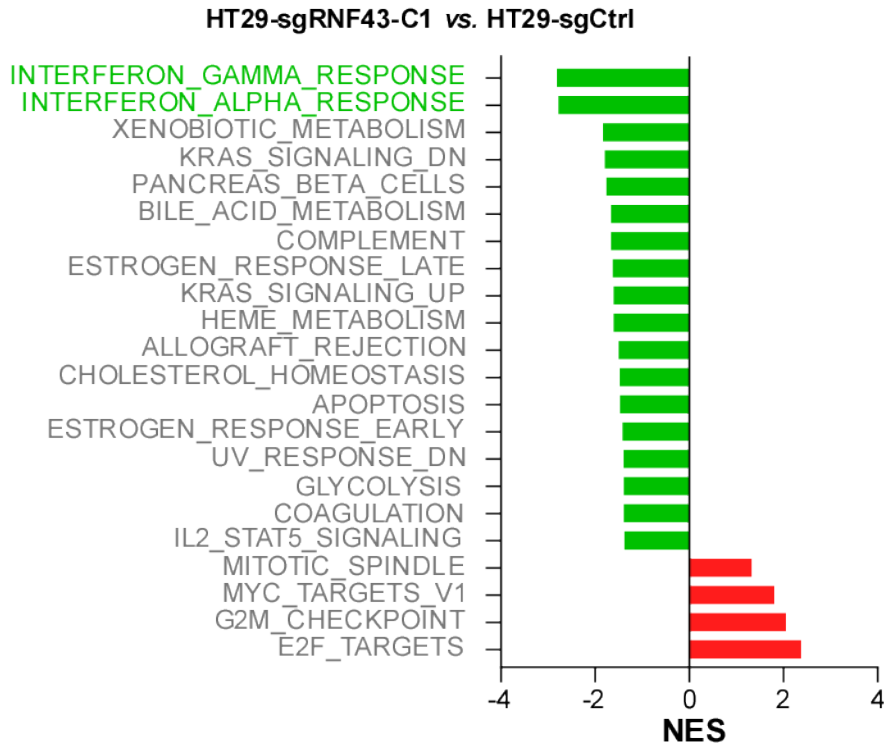

GSEA analysis of HT29 *RNF43*<sup>659mut</sup> RNA-Seq compared to isogenic control cells. Green bars represent gene sets with decreased expression and red bars represent gene sets with increased expression. Source data are provided as a Source Data file. NES: normalized enrichment score



Supplementary Table 1: mTOR/PI3K drug hits from primary screening (22 selective compounds over *RNF43* WT isogenic cells bolded)

| <b>Drug Name</b>   | <b>MOA</b>                            | <b>Phase</b>       |
|--------------------|---------------------------------------|--------------------|
| <b>WYE-125132</b>  | <b>mTOR inhibitor</b>                 | <b>Preclinical</b> |
| <b>OSI-027</b>     | <b>mTOR inhibitor</b>                 | <b>Phase 1</b>     |
| <b>MLN0128</b>     | <b>mTOR inhibitor</b>                 | <b>Phase 2</b>     |
| <b>torin-1</b>     | <b>mTOR inhibitor</b>                 | <b>Preclinical</b> |
| <b>torin-2</b>     | <b>mTOR inhibitor</b>                 | <b>Preclinical</b> |
| <b>AZD2014</b>     | <b>mTOR inhibitor</b>                 | <b>Phase 2</b>     |
| <b>AZD8055</b>     | <b>mTOR inhibitor</b>                 | <b>Phase 1</b>     |
| <b>WYE-354</b>     | <b>mTOR inhibitor</b>                 | <b>Preclinical</b> |
| <b>XL388</b>       | <b>mTOR inhibitor</b>                 | <b>Preclinical</b> |
| WYE-687            | mTOR inhibitor                        | Preclinical        |
| WAY-600            | mTOR inhibitor                        | Preclinical        |
| <b>PKI-179</b>     | <b>mTOR inhibitor, PI3K inhibitor</b> | <b>Phase 1</b>     |
| <b>NVP-BEZ235</b>  | <b>mTOR inhibitor, PI3K inhibitor</b> | <b>Phase 2</b>     |
| <b>SB-2343</b>     | <b>mTOR inhibitor, PI3K inhibitor</b> | <b>Phase 1</b>     |
| <b>voxtalisib</b>  | <b>mTOR inhibitor, PI3K inhibitor</b> | <b>Phase 2</b>     |
| <b>PF-04691502</b> | <b>mTOR inhibitor, PI3K inhibitor</b> | <b>Phase 2</b>     |
| GSK2126458         | mTOR inhibitor, PI3K inhibitor        | Phase 1            |
| <b>SAR405</b>      | <b>PI3K inhibitor</b>                 | <b>Preclinical</b> |
| <b>alpelisib</b>   | <b>PI3K inhibitor</b>                 | <b>Phase 3</b>     |
| <b>CH5132799</b>   | <b>PI3K inhibitor</b>                 | <b>Phase 1</b>     |
| <b>buparlisib</b>  | <b>PI3K inhibitor</b>                 | <b>Phase 3</b>     |
| <b>PIK-93</b>      | <b>PI3K inhibitor</b>                 | <b>Preclinical</b> |
| <b>copanlisib</b>  | <b>PI3K inhibitor</b>                 | <b>Launched</b>    |
| <b>GDC-0941</b>    | <b>PI3K inhibitor</b>                 | <b>Phase 2</b>     |
| <b>taselisib</b>   | <b>PI3K inhibitor</b>                 | <b>Phase 3</b>     |
| ZSTK-474           | PI3K inhibitor                        | Phase 1/Phase 2    |
| CUDC-907           | PI3K inhibitor                        | Phase 2            |
| IPI-145            | PI3K inhibitor                        | Phase 3            |
| PI-828             | PI3K inhibitor                        | Preclinical        |
| LY3023414          | PI3K inhibitor, mTOR inhibitor        | Phase 2            |

Supplementary Table 2. Characteristics of Organoid Samples

| Sample                    | COCA-0235<br>(Tumor)                                       | 5334_N (Normal) |
|---------------------------|------------------------------------------------------------|-----------------|
| Patient Sex               | F                                                          | M               |
| Patient Age (yo)          | 50-60                                                      | 50-60           |
| Tumor Location            | Right Colon                                                | Left colon      |
| MMR status                | Deficient                                                  | Proficient      |
| Mutations<br>(Tier 1 & 2) | KRAS (p.G13D);<br>MSH2 (p.S473*);<br>RNF43<br>(p.G659V*41) | N/A             |

| Supplementary Table 3. Primer sequences used for cloning and PCR |                                                                      |
|------------------------------------------------------------------|----------------------------------------------------------------------|
| Primer                                                           | sequence (5' to 3')                                                  |
| RNF43-WT-full length -F                                          | AACACAGGTGTCGTGACGCGGCCAC<br>CATGAGTGGTGGCCACCAGCTGCA                |
| RNF43-WT-full length-R                                           | GTTGGTGGCGCCGCTGCATCGAGAC<br>CGAGGAGAGGGTTAGGGATCACAGC<br>CTGTTACAC  |
| RNF43-659fs-full length -F                                       | AACACAGGTGTCGTGACGCGGCCAC<br>CATGAGTGGTGGCCACCAGCTGCA                |
| RNF43-659fs-full length -R                                       | GTTGGTGGCGCCGCTGCATCGAGAC<br>CGAGGAGAGGGTTAGGGATAGGGG<br>TGTGCCTCTGG |
| RNF43-659stop terminal -F                                        | AACACAGGTGTCGTGACGCGGCCAC<br>CATGAGTGGTGGCCACCAGCTGCA                |
| RNF43-659stop terminal-R                                         | GTTGGTGGCGCCGCTGCATCGAGAC<br>CGAGGAGAGGGTTAGGGATCCCCCG<br>CCTTTTCCTC |

Supplementary Table 4. Primers used for validation of CRISPR/Cas9 editing by Next Generation Sequencing (NGS) and Sanger Sequencing

| Primer                           | sequence (5' to 3')  |
|----------------------------------|----------------------|
| RNF43 <sup>117mut</sup> NGS-F    | AAGCCTCCCTAACCCAAGTC |
| RNF43 <sup>117mut</sup> NGS-R    | AGCACAGGGTCTTCTCACAG |
| RNF43 <sup>659mut</sup> NGS-F    | CCACCTTCTCCTGATCAGCA |
| RNF43 <sup>659mut</sup> NGS-R    | AAAATCTGGCAAGCTGGGTG |
| RNF43 <sup>659mut</sup> Sanger-F | GTCCAGGCCTCCTATTCTC  |
| RNF43 <sup>659mut</sup> Sanger-R | CACCCACTTCCCTCTGAAAA |

Supplementary Table 5. List of antibodies used for immunoblotting and detection

| Antibody                            | Clone           | dilution | Manufacturer catalog number        | RRID        |
|-------------------------------------|-----------------|----------|------------------------------------|-------------|
| $\beta$ -Actin                      | 8H10D10         | 1:1000   | Cell Signaling Technology #3700    | AB_2242334  |
| GAPDH                               | mAbcam 9484     | 1:2000   | Abcam # ab9484                     | AB_307274   |
| p-AKT (Ser473)                      | D9E             | 1:500    | Cell Signaling Technologies #4060T | AB_2315049  |
| AKT                                 | 11E7            | 1:1000   | Cell Signaling Technologies #4685S | AB_2225340  |
| 4EBP1                               | 236B4           | 1:1000   | Cell Signaling Technologies #2855S | AB_560835   |
| p-4EBP1(Ser65)                      | 174A9           | 1:1000   | Cell Signaling Technology #9456    | AB_823413   |
| S6 Ribosomal Protein                | 5G10            | 1:1000   | Cell Signaling Technology #2217S   | AB_331355   |
| p-S6 Ribosomal Protein (Ser235/236) | D57.2.2E        | 1:1000   | Cell Signaling Technology #4858    | AB_916156   |
| p85                                 | 19H8            | 1:500    | Cell Signaling Technology # 4257S  | AB_659889   |
| LRP6                                | C5C7            | 1:500    | Cell Signaling Technology #2560S   | AB_2139329  |
| p-LRP6 (Ser1490)                    | 2568            | 1:500    | Cell Signaling Technology #2568S   | AB_2139327  |
| $\beta$ -Catenin                    | 14/Beta-Catenin | 1:3000   | BD Biosciences #610153             | AB_397554   |
| GSK3 $\beta$                        | D5C5Z           | 1:2000   | Cell Signaling Technology #12456S  | AB_2636978  |
| p-GSK3 $\beta$ (Ser9)               | 9336            | 1:500    | Cell Signaling Technology #9336S   | AB_331405   |
| CK1                                 | 2655            | 1:2000   | Cell Signaling Technology #2655S   | AB_2283593  |
| Anti-Ubiquitinated proteins         | FK2             | 1:1000   | Sigma Aldrich #04263               | AB_612093   |
| V5-tag                              | N/A             | 1:1000   | Thermo-Fisher Scientific # R960-25 | AB_2556564  |
| IRDye 680CW goat anti-mouse         | N/A             | 1:5000   | LI-COR Biosciences #926-68070      | AB_10956588 |
| IRDye 800CW goat anti-mouse         | N/A             | 1:5000   | LI-COR Biosciences #926-32210      | AB_621842   |
| IRDye 800CW goat anti-rabbit        | N/A             | 1:5000   | LI-COR Biosciences #926-32211      | AB_2224293  |

| Supplementary Table 6. Primers for qRT-PCR |                        |
|--------------------------------------------|------------------------|
| Primer                                     | sequence (5' to 3')    |
| <i>IFIT1</i> -realtime PCR-F               | GCGCTGGGTATGCGATCTC    |
| <i>IFIT1</i> -realtime PCR-R               | CAGCCTGCCTTAGGGGAAG    |
| <i>OAS2</i> -realtime PCR-F                | CTCAGAAGCTGGGTTGGTTTAT |
| <i>OAS2</i> -realtime PCR-R                | ACCATCTCGTCGATCAGTGTC  |
| <i>RSAD2</i> -realtime PCR-F               | TGGGTGCTTACACCTGCTG    |
| <i>RSAD2</i> -realtime PCR-R               | GAAGTGATAGTTGACGCTGGTT |
| <i>MX1</i> -realtime PCR-F                 | GTTTCCGAAGTGGACATCGCA  |
| <i>MX1</i> -realtime PCR-R                 | CTGCACAGGTTGTTCTCAGC   |
