# Supplementary material for: RNF43 G659fs is an oncogenic colorectal cancer mutation and sensitizes tumor cells to PI3K/mTOR inhibition
Source: PubMed Central journal article supplement (PMC9177965; doi:10.1038/s41467-022-30794-7), 2022-06-08
Supplement: 41467_2022_30794_MOESM2_ESM.pdf [file 41467_2022_30794_MOESM2_ESM.pdf]

## **Description of Additional Supplementary Files**

**File Name:** Supplementary Data 1

**Description:** Primary drug screening hit list (612 compounds, z-score < -3)

**File Name:** Supplementary Data 2

**Description:** Proteomic Analysis of RNF43\_G659Vfs for identification of interacting partners ( $p < 0.05$ )
